# Supplementary material for: BCAA catabolism mediates POU2AF1 propionylation to enhance T-ALL development
Source: Research Square preprint supplement (doi:10.21203/rs.3.rs-7676395/v1), 2025-10-15
Supplement: Supplementary file 1 [file e63dfa3667f8aa960a094760.docx]

**Supplementary materials**

**
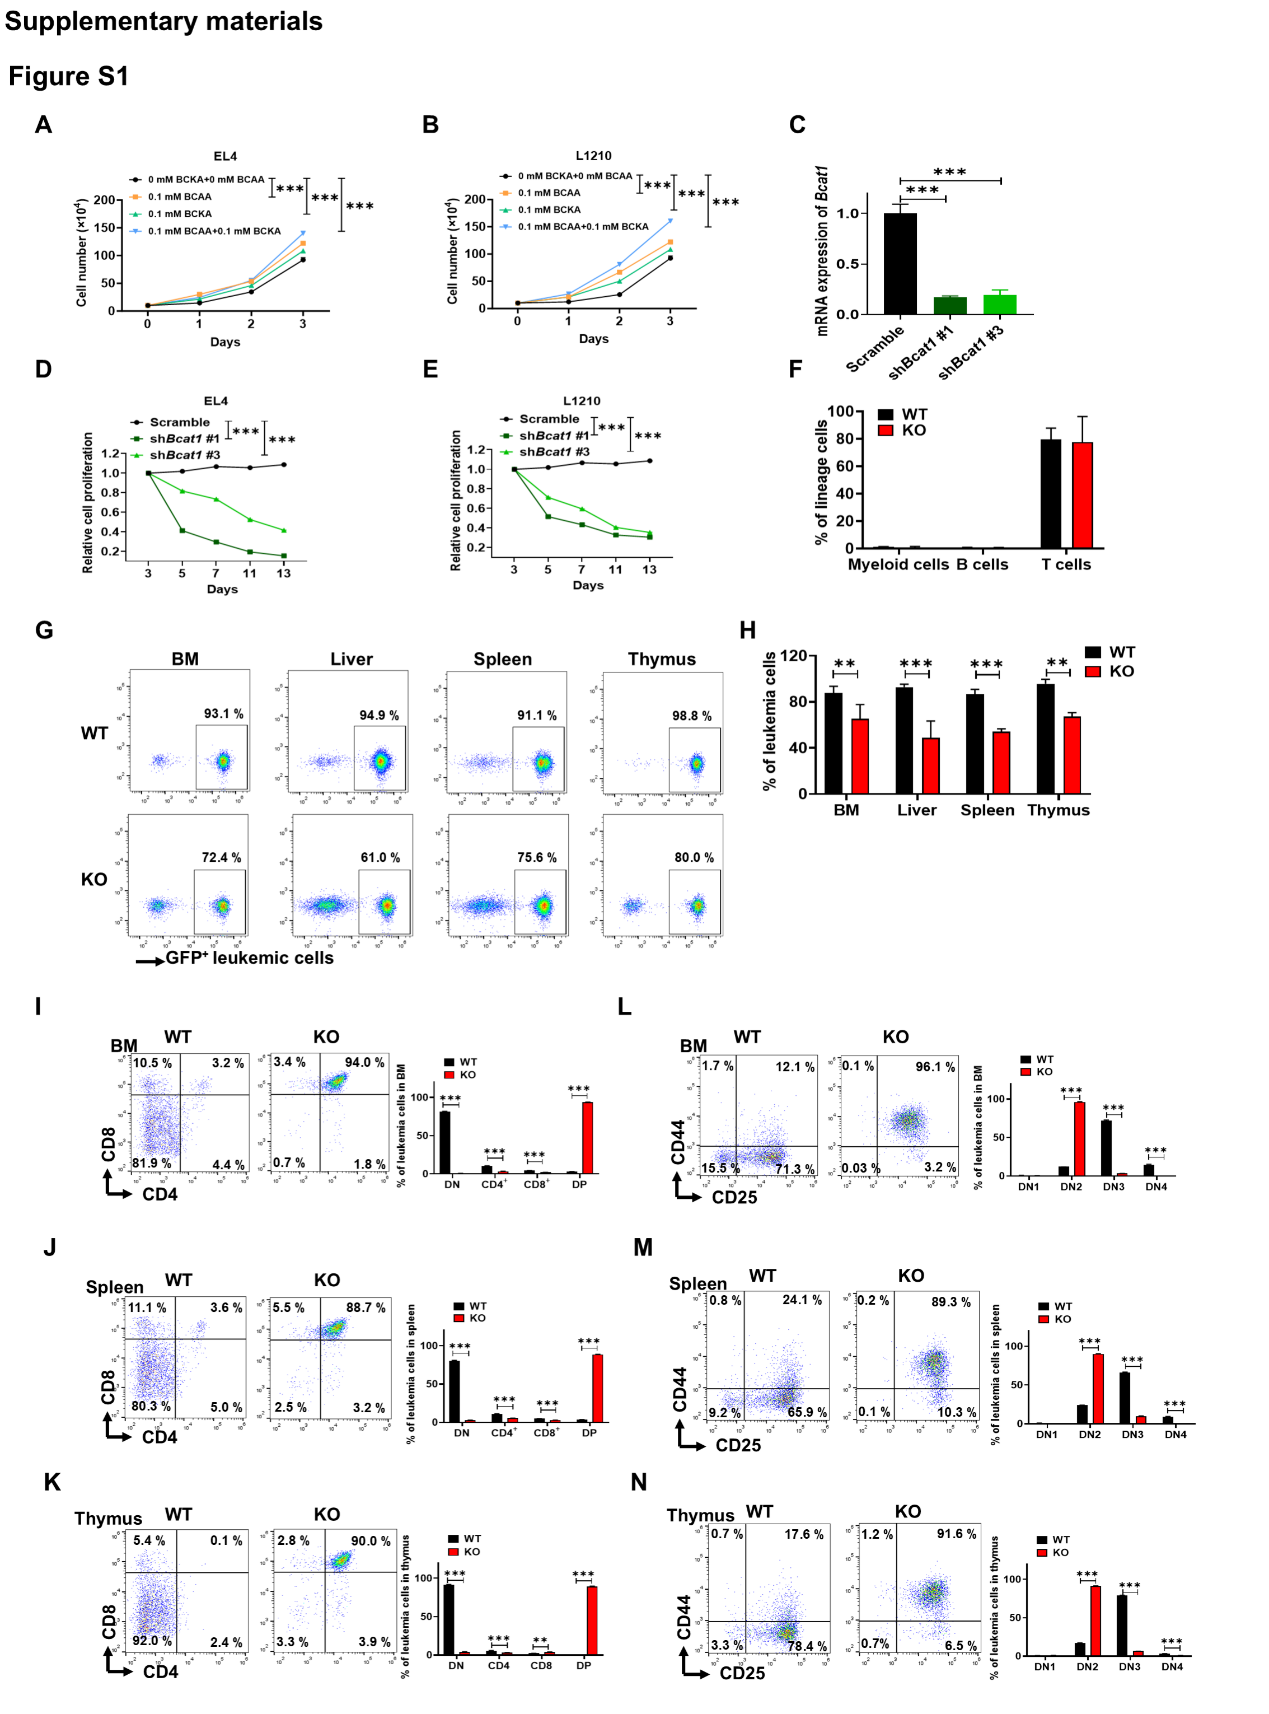
**

**Figure S1 (related to Figure 1). BCAT1 promotes T-ALL cell proliferation and tissue infiltration.** (A–B) Cell proliferation curves of EL4 and L1210 cells cultured in BCAA-free medium for 24 hours supplemented with 0.1 mM BCAAs or BCKAs (n=4). (C) The knockdown efficiencies of *BCAT1* shRNAs specifically targeting murine *Bcat1* (sh-*Bcat1* #1 and #3) were measured in EL4 cells via qRT–PCR (n=3). (D–E) Proliferation assay of EL4 and L1210 cells infected with sh-*Bcat1*#1, sh-*Bcat1*#3, or scrambled control (n=3). (F) Quantification of myeloid and lymphoid populations in the peripheral blood of recipient mice after primary transplantation (n=5). (G–H) Representative flow cytometry plots showing leukemia cell (GFP+) infiltration in the bone marrow, liver, spleen and thymus after primary transplantation. (I–K) Representative flow cytometry analysis and quantification of CD4/CD8 populations among leukemia cells (GFP+) in the bone marrow, spleen and thymus. (L–N) Representative flow cytometry analysis and quantification of CD25/CD44 populations among leukemia cells (GFP+) in the bone marrow, spleen and thymus. The data are presented as the means ± SDs. One-way ANOVA with Tukey’s multiple comparison test (C) and two-way ANOVA with Sidak’s multiple comparison test (A–B, D–F, H, I–N) were used for comparisons of statistical significance (*, P<0.05; **, P<0.01; and ***, P<0.001).

**
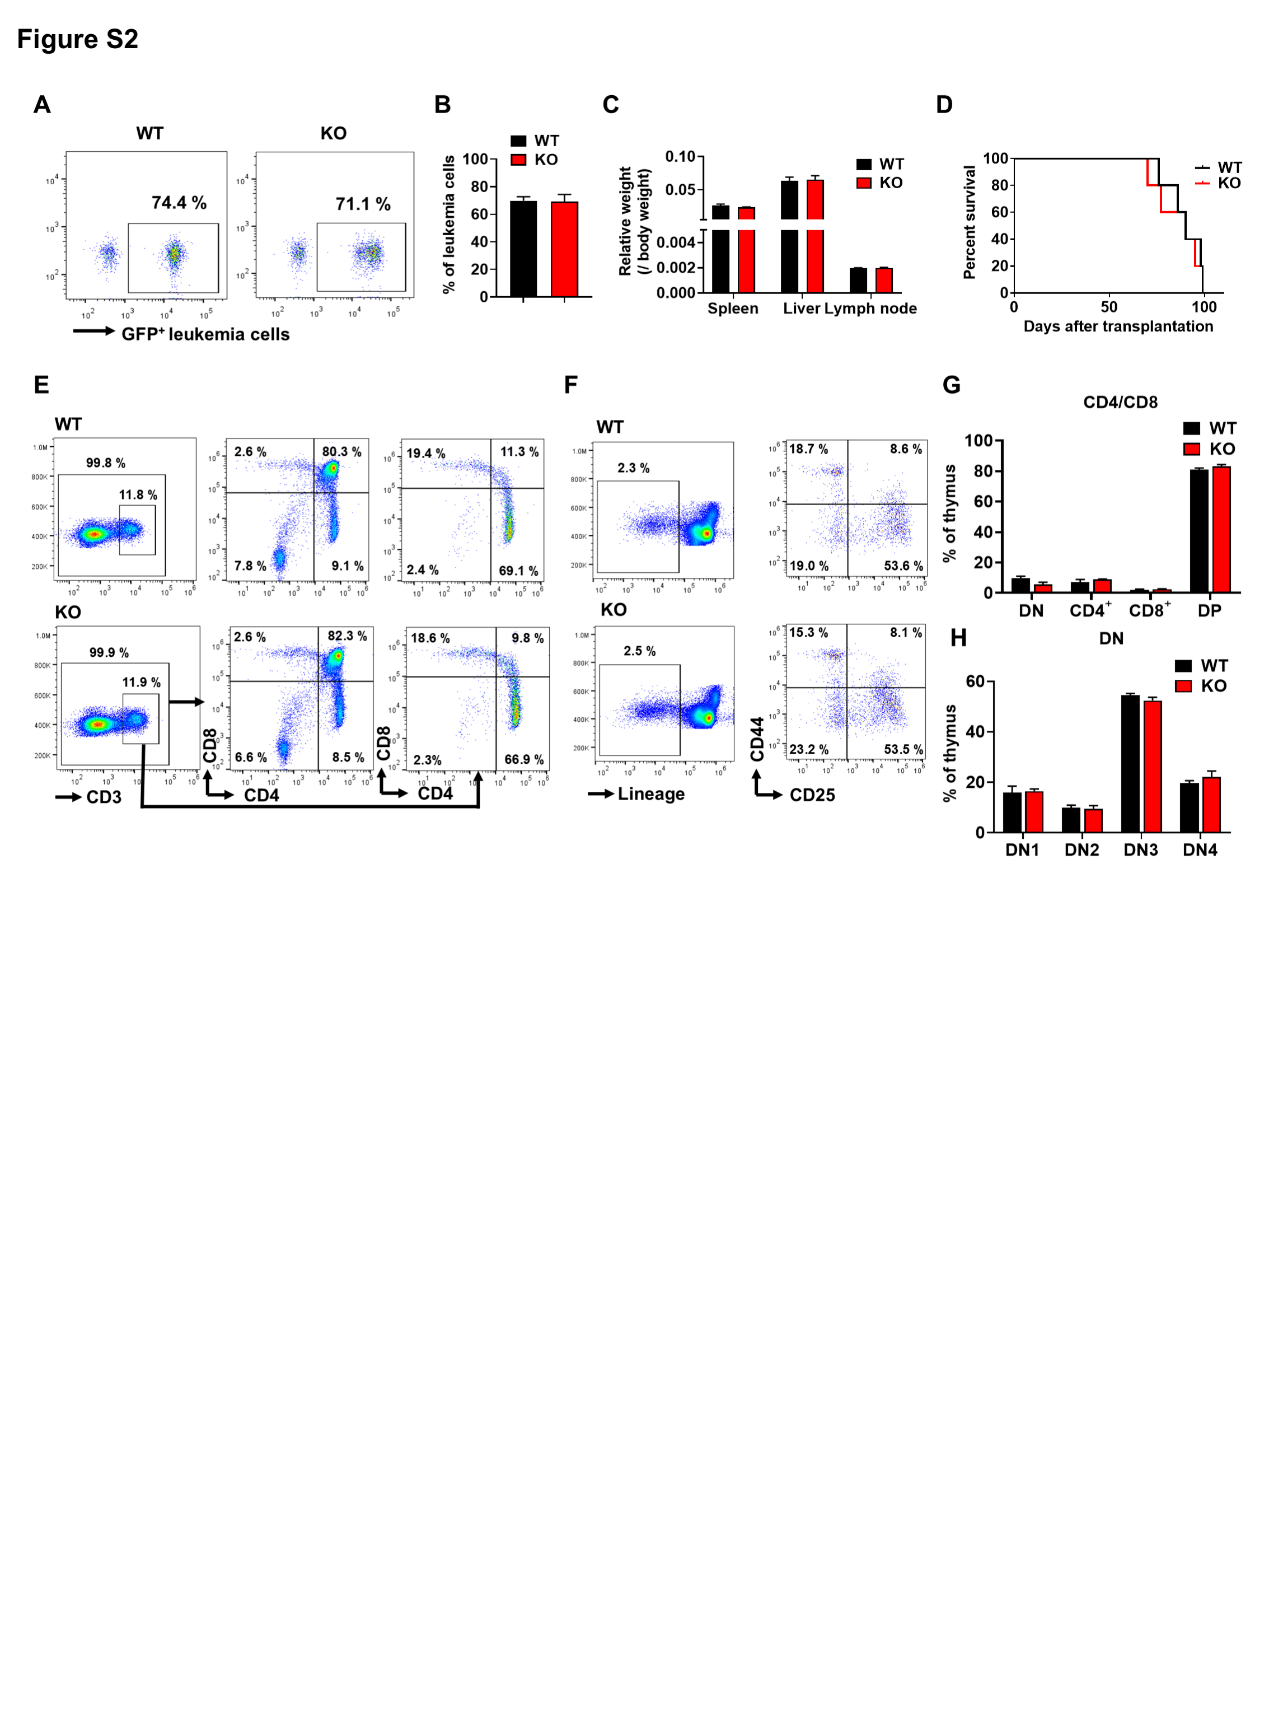
**

**Figure S2 (related to Figure 2). Bcat1 deletion does not affect B-ALL disease progression or thymic T-cell development.** (A) Representative flow cytometry plots of leukemia cells (GFP+) in peripheral blood from a B-ALL mouse model after primary transplantation. (B) Quantification of leukemia cells (GFP+) in peripheral blood (n=5). (C) Organ weight quantification of the liver, spleen and thymus posttransplantation (n=3–4). (D) Survival analysis of recipient mice transplanted with WT and KO B-ALL cells in a B-ALL model (n=5). (E–H) Analysis of thymic T-cell differentiation in adult WT and KO mice (n=3). DN (CD4-CD8-); DP (CD4+CD8+); DN1 (CD44+CD25-); DN2 (CD44+CD25+); DN3 (CD44- CD25+); DN4 (CD44- CD25-); Lineage- (CD4-CD8-B220-TER119-CD11b-Gr1-)

The data are presented as the means ± SDs. Student’s two-tailed unpaired t test (B), log-rank test (D) and two-way ANOVA with Sidak’s multiple comparison test (C, G, H) were used for comparisons of statistical significance (*, P<0.05; **, P<0.01; and ***, P<0.001).

**
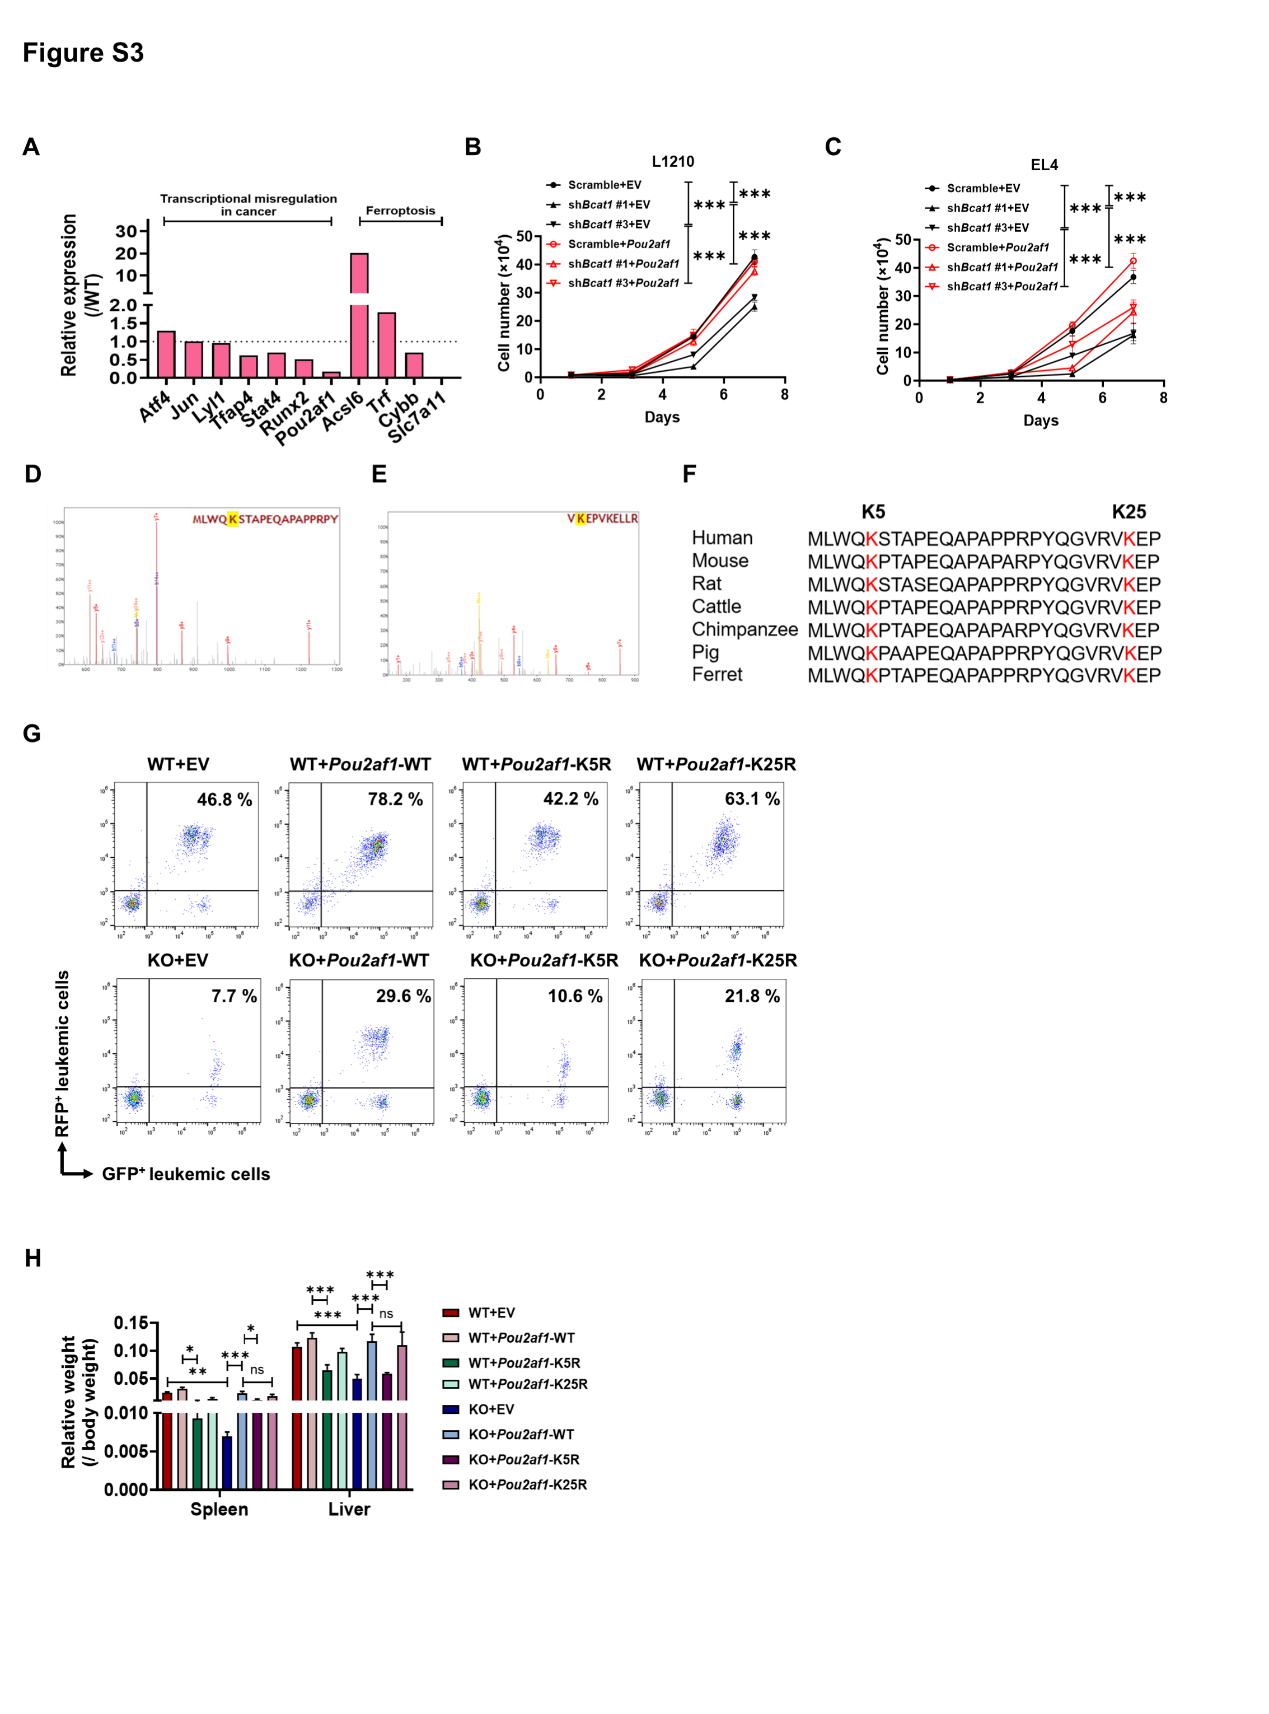
**

**Figure S3 (related to Figure 3). K5R propionylation is critical for the self-renewal capacity of T-ALL cells.** (A) Candidate genes related to transcriptional misregulation in cancer and ferroptosis were analyzed using RNA-sequencing data from WT and KO T-ALL cells. (B–C) Cell proliferation curves comparing L1210 and EL4 cells transduced with a scramble control, *Bcat1* knockdown (shBCAT1 #1 and #3), *Pou2af1* overexpression alone, or *Pou2af1* overexpression in combination with *Bcat1* knockdown (n=4). (D) Tandem mass spectrometry analysis of the propionylated peptide (MLWQKprSTA) surrounding the K5 site in POU2AF1. (E) Tandem mass spectrometry analysis of the propionylated peptide (VKprEPVKELLR) surrounding the K25 site in POU2AF1. (F) Sequence alignment of the K5 and K25 site in POU2AF1 across species, including human (*Homo* *sapiens*, ID: NP_006226.2), mouse (*Mus musculus*, ID: NP_035266.1), rat (*Rattus norvegicus*, ID: NP_001103069.1), cattle (*Bos taurus*,ID:NP_001069383.1), chimpanzee (*Pan troglodytes*, ID: XP_508747.4) , pig (*Sus scrofa*, ID: NP_001230989.1), ferret (*Mustela putorius furo*, ID: XP_004749834.1) Conserved lysine residues of interest are highlighted in red. (G) Representative flow cytometric analysis of GFP+ mCherry+ leukemia cells (The markers for the indication of leukemia cells were GFP+ andmCherry+, which were the tags for the MSCV-*Notch1*(ΔE)-IRES-GFP plasmid and MSCV-mCherry overexpression plasmid) in peripheral blood from recipient mice transplanted with WT and KO T-ALL cells overexpressing *Pou2af1* WT or mutants (K5R, K25R). (H) Quantification of the liver and spleen weights of recipient mice transplanted with the abovementioned T-ALL cells (n=3). The data are presented as the means ± SDs. Two-way ANOVA with Sidak’s multiple comparison test (B, C, H) were used for comparisons of statistical significance (*, P<0.05; **, P<0.01; and ***, P<0.001).

**
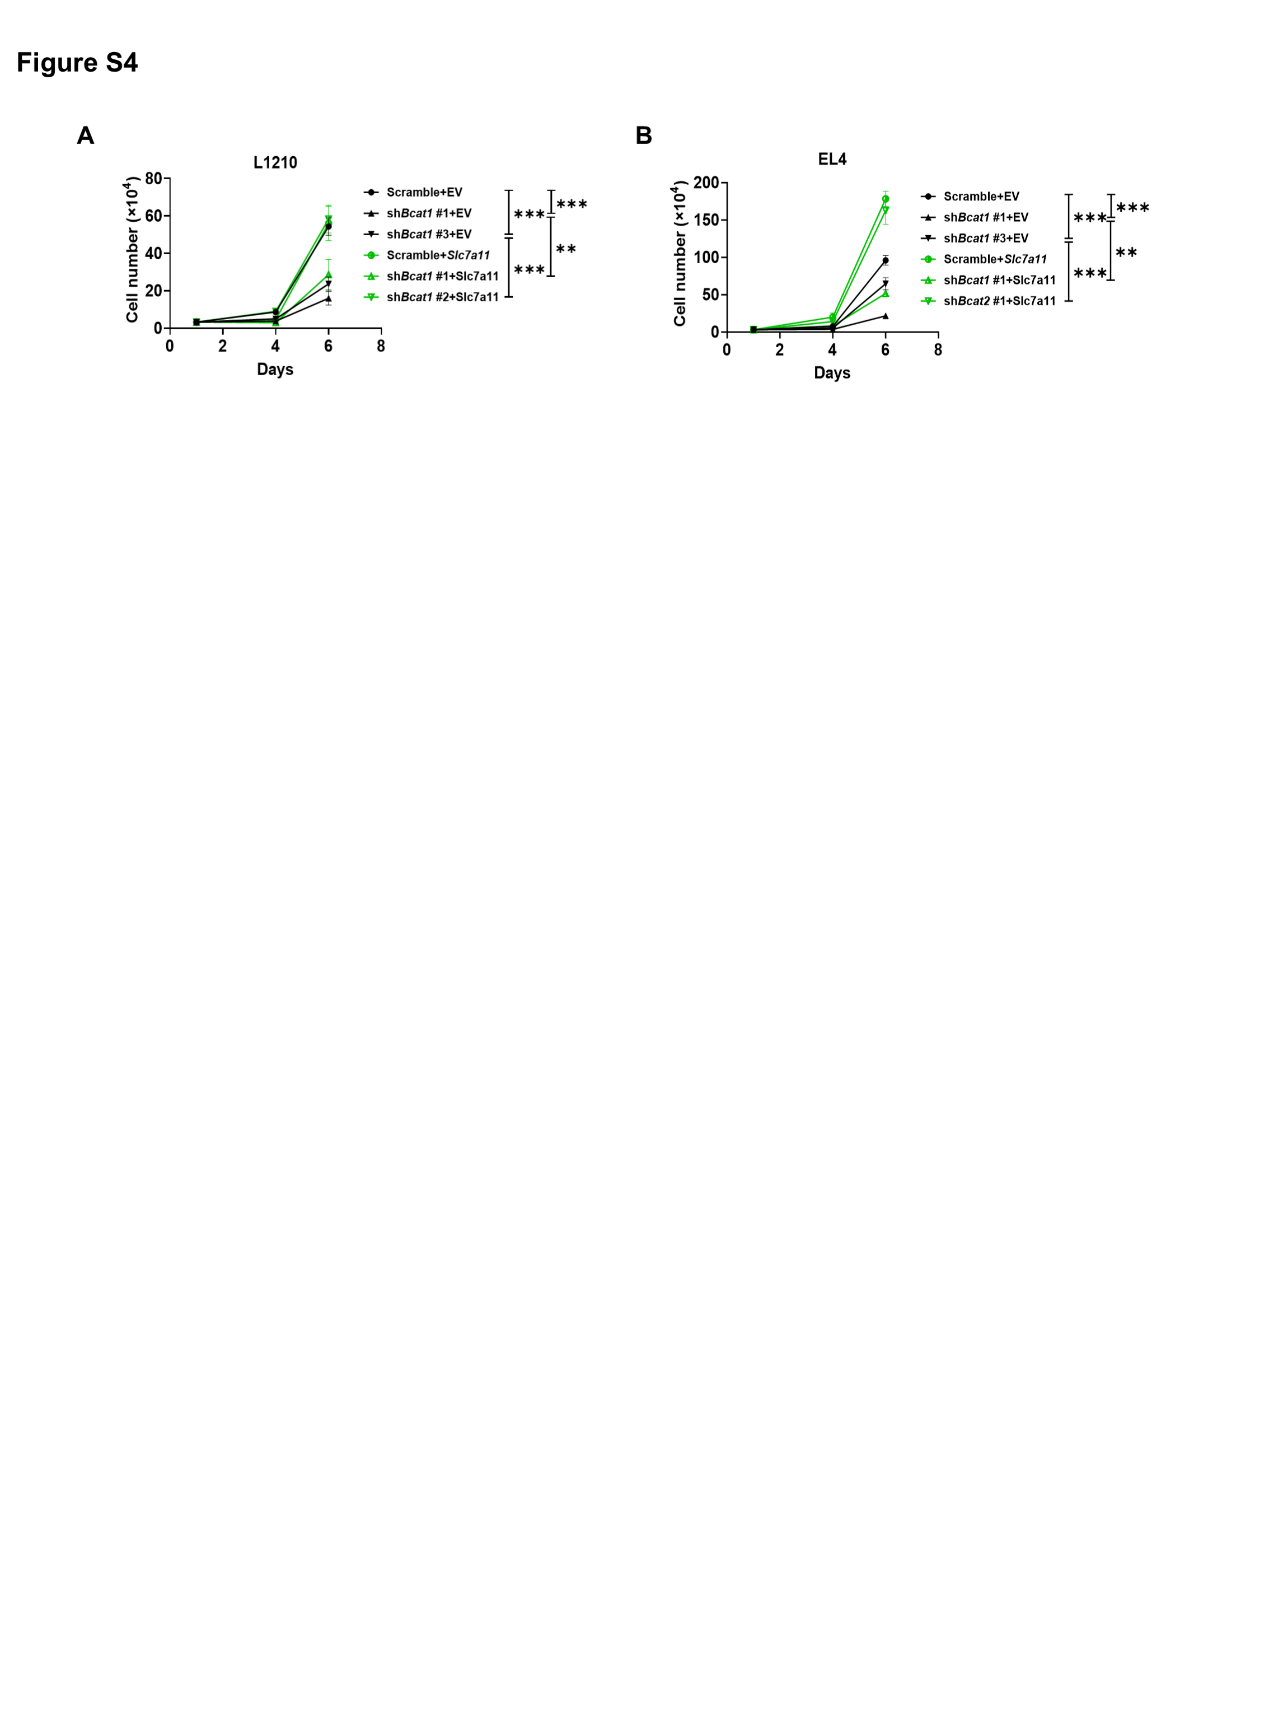
**

**Figure S4 (related to Figure 4). SLC7A11 overexpression rescues proliferation defects induced by BCAT1 deletion in T-ALL cells.** (A–B) Cell proliferation curves comparing L1210 and EL4 cells transduced with a scramble control, *Bcat1* knockdown (shBCAT1 #1 and #3), *Slc7a11* overexpression alone, or *Slc7a11* overexpression in combination with *Bcat1* knockdown (n=4). The data are presented as the means ± SDs. Two-way ANOVA with Sidak’s multiple comparison test (A, B) was used for comparisons of statistical significance (*, P<0.05; **, P<0.01; and ***, P<0.001).

**
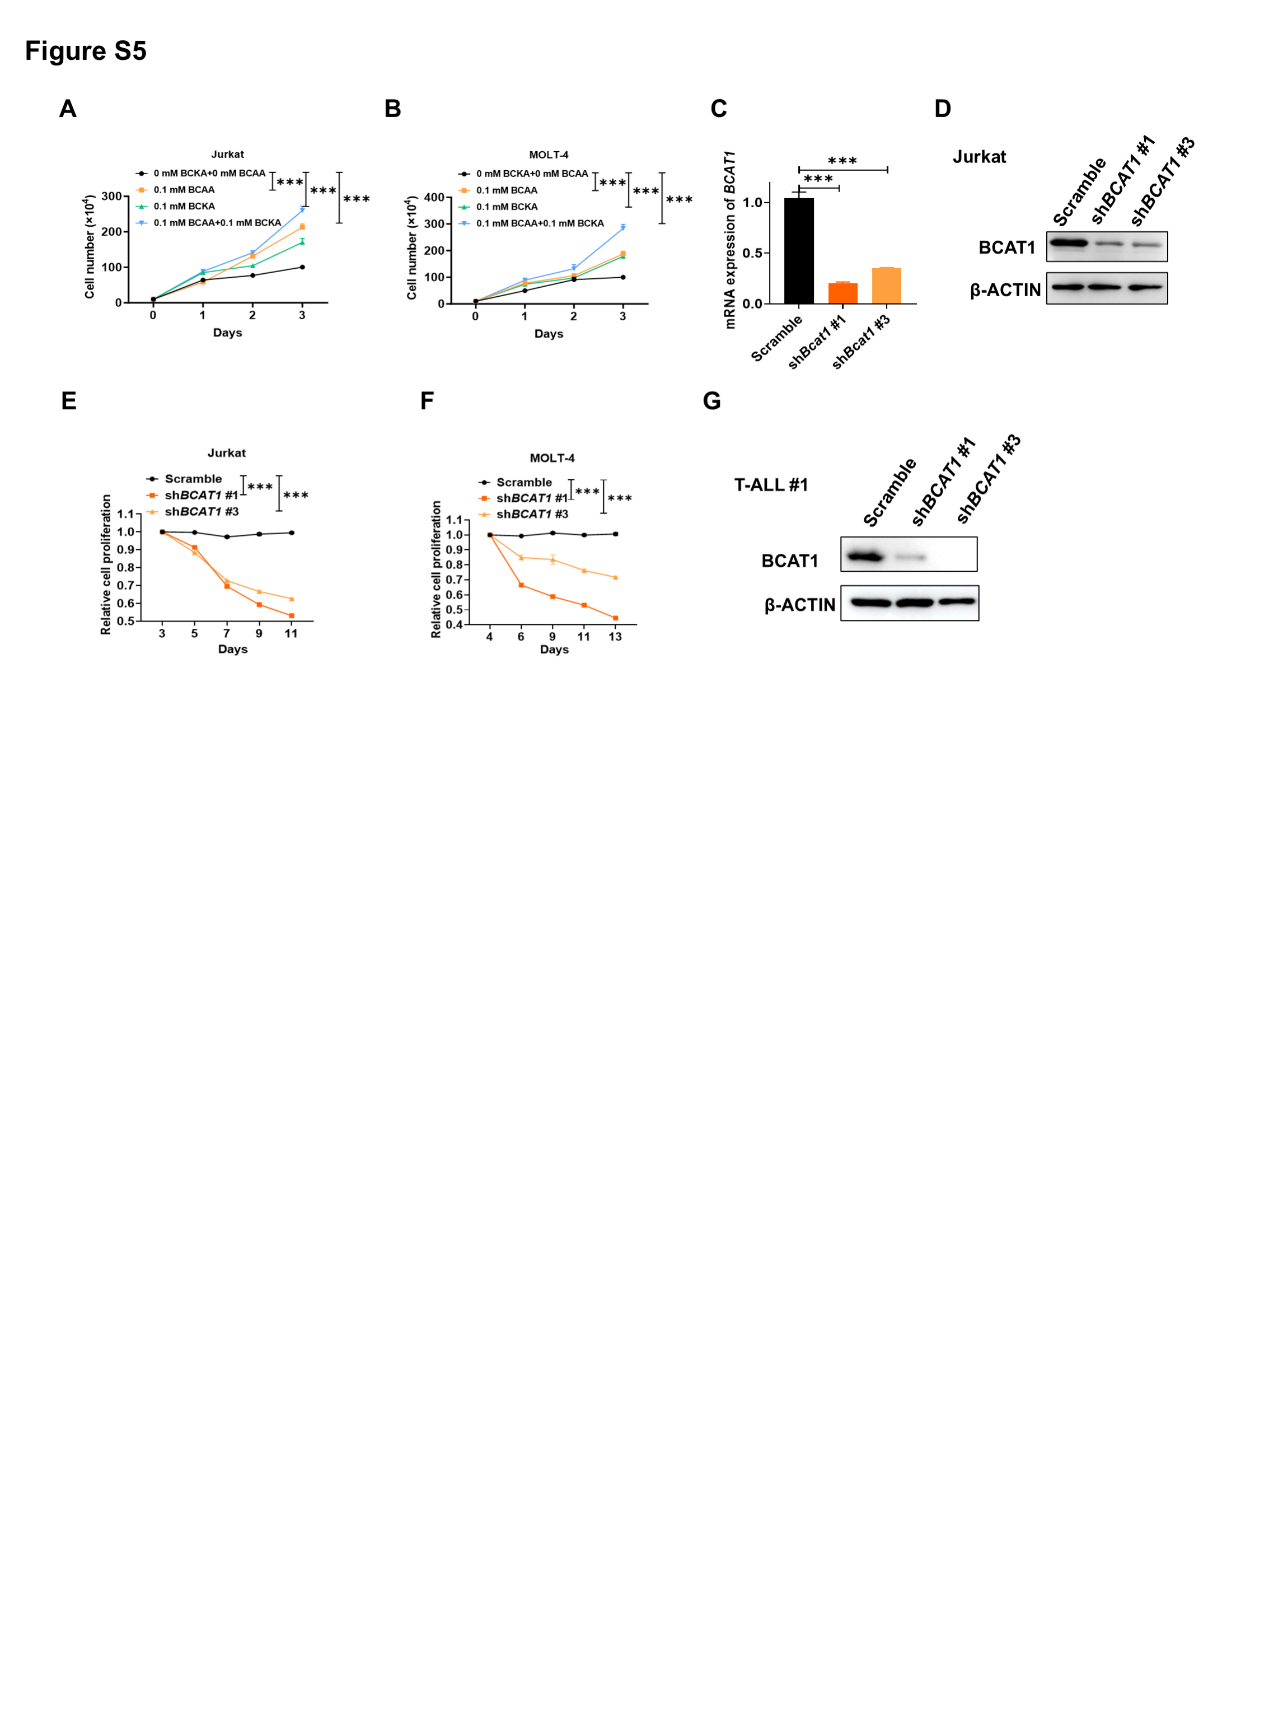
**

**Figure S5 (related to Figure 5). Knockdown of BCAT1 expression suppresses the proliferation of human T-ALL cell lines.** (A–B) Cell proliferation curves of Jurkat and MOLT-4 cells cultured in BCAA-free medium for 24 hours supplemented with 0.1 mM BCAAs or BCKAs (n=4). (C) The knockdown efficiencies of *BCAT1* shRNAs specifically targeting human *BCAT1* (sh-*BCAT1* #1 and #3) were measured in Jurkat cells via qRT–PCR (n=3). (D) Western blot showing BCAT1 knockout efficiency in Jurkat cell lines. (E–F) Cell proliferation curves of Jurkat and MOLT-4 cells following BCAT1 knockdown (n=3). (G) The knockdown efficiencies of *BCAT1* shRNAs specifically targeting human *BCAT1* (sh-*BCAT1* #1 and #3) were measured in patient-derived primary T-ALL cells. The data are presented as the means ± SDs. One-way ANOVA with Tukey’s multiple comparison test (C) and two-way ANOVA with Sidak’s multiple comparison test (A–B, E-F) were used for comparisons of statistical significance (***, P<0.001)

**Supplemental Methods and Materials**

**Cell Culture**

HEK293T cells (ATCC) were cultured in Dulbecco's modified Eagle’s medium (BasalMedia, L110KJ) supplemented with 10% fetal bovine serum (FBS; Excell, FSD500) and 1% penicillin‒streptomycin (BasalMedia, S110JV). Cells were passaged with 0.25% trypsin-EDTA (BasalMedia, S310JV). Cell lines (EL4, L1210, Jurkat, and MOLT-4) were maintained in RPMI-1640 medium (BasalMedia, L210KJ) supplemented with 10% FBS and 1% penicillin‒streptomycin at 37 °C in a 5% CO₂ atmosphere. The cells were passaged every 2–3 days. Primary murine T-ALL cells were cultured in StemSpanTM SFEM (STEMCELL Technologies, 09650) supplemented with 20% FBS, recombinant mouse SCF (10 ng/mL), and IL-7 (10 ng/mL). Primary human T-ALL cells were maintained in α-MEM (Gibco, C12571500BT) supplemented with 20% FBS, recombinant human FLT3 ligand (5 ng/mL), IL-7 (2 ng/mL), and SCF (10 ng/mL).

**Murine T-ALL Model**

The murine T-ALL model was established as described previously [35]. Briefly, the MSCV-*Notch1*(ΔE)-IRES-GFP retroviral plasmid and pCL-ECO packaging plasmid were cotransfected into HEK293T cells. Viral supernatants were collected at 48 and 72 hours post-transfection. Donor C57BL/6 mice were pretreated with 5-fluorouracil (100 mg/kg). Bone marrow was harvested on Day 5.5. Lineage-negative (Lin-) bone marrow cells were isolated using a mouse lineage depletion kit (BD Biosciences, 558074) and transduced with viral supernatants (1000×g, 90 min, 37 °C) in the presence of 10 µg/ml polybrene (Sigma). Infected cells were cultured for 48 hours in StemSpan™ SFEM supplemented with SCF (10 ng/mL) and TPO (10 ng/mL). Subsequently, 2×10⁵-transduced Lin⁻ BM cells were injected intravenously by the retro-orbital sinus into lethally irradiated C57BL/6 recipient mice. GFP+ T-ALL cells from the primary recipients were sorted by flow cytometry (FACSAria III, BD Biosciences) and transplanted (1×10⁴ cells) into secondary lethally irradiated mice. Leukemia progression was assessed via flow cytometry of GFP+ cells in peripheral blood. Survival and GFP+ cell infiltration in the spleen, liver, and thymus were monitored.

In certain experiments, shRNA constructs (pLKO.1-IRES-GFP) designed to specifically silence murine *Bcat1* or human *BCAT1* were co-transfected with the packaging plasmids pSPAX2 and pMD2G (at a 4:3:1 ratio) into 293T cells to generate lentiviruses. These viral particles were subsequently used to infect *NOTCH1*-GFP⁺ bone marrow leukemia cells, human cell lines Jurkat and MOLT-4 (ATCC), murine cell lines EL4 and L1210 (ATCC), as well as primary T-ALL patient samples, followed by assessment of *in vitro* cell proliferation. In parallel, FACS-sorted GFP⁺ murine spleen leukemia cells (1×10⁴) or human GFP⁺ Jurkat cells (2×10⁶) were transplanted into lethally irradiated C57BL/6 mice or sublethally irradiated NOD-SCID mice, respectively, for monitoring leukemia progression.

For rescue experiments, retroviral plasmids MSCV-HA-*Pou2af1*-mCherry, MSCV-HA-*Slc7a11*-mCherry, or MSCV-HA-*Pou2af1*-mutant-mCherry were co-transfected with the packaging plasmid pCL-ECO (2:1) into 293T cells. The harvested viral supernatants were used to infect WT and *Bcat1*-deficient BM leukemia cells, which were then transplanted into recipient mice for further evaluation.

**Patient-derived xenograft (PDX) model**

Primary T-ALL cells were isolated from patient bone marrow aspirates by Ficoll gradient centrifugation and injected (1 × 107 cells/mouse) into sublethally irradiated (1 Gy) NOD-SCID mice via retro-orbital injection. Engraftment was monitored by flow cytometric detection of human CD45+ cells in peripheral blood. Leukemia cells from PDX bone marrow were collected for secondary transplantation.

**mRNA isolation and quantitative RT‒PCR**

Total RNA from T-ALL cells was extracted with the FastPure® Cell/Tissue Total RNA Isolation Kit V2 (Vazyme, #RC112). The obtained RNA was treated with gDNA wiper and reverse transcribed into cDNA using the HiScript III Reverse Transcriptase kit (Vazyme, #R323). Quantitative real-time PCR (RT-qPCR) was carried out with ChamQ SYBR qPCR Master Mix (Vazyme, #Q341-02), and fluorescence signals were measured on a Bio-Rad CFX96 Touch Real-Time PCR Detection System. Gene expression was normalized to β-ACTIN, and primer sequences are listed in Table S1.

**RNA sequencing and analysis**

T-ALL cells were sorted from the bone marrow of three leukemic mice per group (WT and *Bcat1*-KO) using a FACS Aria II (BD Biosciences). Total RNA was extracted with TRIzol (Invitrogen, #15596026), assessed for integrity and concentration, pooled within each group, and submitted for transcriptome sequencing at Novogene Co., Ltd. Low-quality reads were removed to obtain clean data, which were aligned to the reference genome and subjected to statistical analysis. Gene expression levels were quantified with the Subread feature Counts tool, and differential expression was determined based on fold change >1.5 and P < 0.05 after Benjamini–Hochberg correction. Functional enrichment was conducted using Kyoto Encyclopedia of Genes and Genomes (KEGG) analyses, and significantly enriched pathways were visualized in R studio.

**Flow Cytometry**

Single-cell suspensions were prepared from peripheral blood, bone marrow, spleen, thymus, and liver samples. Red blood cells were lysed using ACK lysis buffer (Gibco). The cells were subsequently washed and resuspended in FACS buffer (PBS + 2% FBS), followed by incubation with fluorochrome-conjugated antibodies on ice for 30 minutes. The antibodies used included anti-mouse CD3e-APC (clone 145-2C11; eBioscience, 17-0031-82), anti-mouse CD4-PE (clone GK1.5; eBioscience, 12-0041-82), anti-mouse CD8α-APC (clone 53-6.7; BioLegend, 10712), anti-mouse CD25-PE (clone PC61; BioLegend, 102007), anti-mouse CD44-APC (clone M1/70; BioLegend, 2010662), anti-mouse Mac-1 (CD11b)-APC (clone M1/70; eBioscience, 14-0112-82), anti-mouse Gr-1 (Ly6G/C)-PE (clone RB6-8C5; eBioscience, 2021-06-25), anti-mouse B220-PE (clone RA3-6B2; eBioscience, 12-0452-85), and anti-human CD45-APC (clone HI30; BD Pharmingen, 555485). For intracellular staining (Ki-67), the cells were fixed and permeabilized using Fixation/Permeabilization Diluent Buffer Set (eBioscience, 00-5223-56) according to the manufacturer's instructions, followed by staining with anti-mouse Ki-67-PE (clone SolA15, eBioscience, 12-5698-82). Apoptosis was assessed using an Annexin V-APC Apoptosis Detection Kit (MULTI SCIENCE, AP105) according to the manufacturer's protocol. Cell cycle analysis was performed by staining with Hoechst 33342 (5 µg/ml; Sigma, B2261) for 45 minutes at 37 °C. Data were acquired via a CytoFLEX S flow cytometer (Beckman) and analyzed using FlowJo software (v10.8.1; BD Biosciences).

**Western Blotting**

Cells were washed with ice-cold PBS and lysed in RIPA buffer (Beyotime, P0013C) supplemented with 1% SDS and protease/phosphatase inhibitor cocktail (Roche). The protein concentration was determined using a BCA protein assay kit (Thermo Fisher Scientific). Equal amounts of protein (20–40 µg) were separated by 10% SDS‒PAGE and transferred to PVDF membranes (Merck Millipore). The membranes were blocked with 5% nonfat milk (Sangon Biotech) in TBST (Tris-buffered saline + 0.1% Tween-20) for 1 hour at room temperature and then incubated with primary antibodies diluted in blocking buffer overnight at 4 °C. The primary antibodies used included anti-BCAT1 (ABclonal, A16351), anti-POU2AF1 (HUABIO, JE47-78), anti-SLC7A11 (HUABIO, JE31-93), , anti-β-ACTIN (HUABIO, JF53-10), anti-HA tag (HUABIO, PSH01-92), anti-FLAG tag (HUABIO, M1403-2), and anti-propionyllysine mouse mAb (PTM Biolabs, PTM-203). After being washed, the membranes were incubated with appropriate horseradish peroxidase (HRP)-conjugated secondary antibodies (Jackson ImmunoResearch) for 1 hour at room temperature. The protein bands were visualized using enhanced chemiluminescence (ECL) substrate (Thermo Fisher Scientific) and imaged using an Amersham Imager 600 (GE Healthcare). Band intensities were quantified using ImageJ software (NIH).

**Immunoprecipitation and Mass Spectrometry**

For immunoprecipitation, flag-tagged POU2AF1 (WT) or Flag-tagged K5R/K25R-mutant constructs were transfected into 293T cells cultured in the presence or absence of BCAAs. Cells were lysed in Pierce IP lysis buffer (Thermo Fisher Scientific) supplemented with protease inhibitors, and whole-cell extracts were incubated with anti-Flag M2 affinity gel (Sigma-Aldrich) at 4 °C overnight. The beads were washed extensively, and bound proteins were eluted and analyzed by SDS–PAGE followed by immunoblotting with antibodies against propionyl-lysine to detect POU2AF1 propionylation.

For mass spectrometry, proteins were excised from Coomassie-stained gels, digested with trypsin, and analyzed by LC–MS/MS (Q Exactive, Thermo Fisher Scientific). Spectra were searched against the IPI Human 3.87 database using SEQUEST, and propionylated proteins were confirmed by immunoblotting. All mass spectrometry analyses were performed by Shanghai Yingmu Biotechnology Co., Ltd.

**Luciferase Reporter Assays**

To assess the transcriptional regulation of *Slc7a11* by POU2AF1, HEK293T cells were cotransfected with XZ201-*Pou2af1*-HA or the control vector and the pGL4.27- *Slc7a11* promoter construct. After 24 hours, luciferase activity was measured using the GloMax® Multi Detection System (Promega). Relative activity is expressed as the firefly/Renilla luciferase ratio.

**Chromatin immunoprecipitation (ChIP) assay**

ChIP was performed using a commercial kit (Beyotime). HEK293T cells were cotransfected with XZ201- *Pou2af1*-HA and the pGL4.27-*Slc7a11*-promoter plasmid. Cells were cross-linked with 1% formaldehyde at 37 °C for 10 minutes. The chromatin was sheared and immunoprecipitated overnight at 4 °C using anti-HA (Sigma) or control rabbit IgG (Santa Cruz). The input controls used 1% sonicated chromatin. DNA was purified with a Nucleospin kit, and POU2AF1 binding to the *Slc7a11* promoter was analyzed by semiquantitative PCR using the primers listed in Table S1.

**Cell Proliferation Assay**

T-ALL cell lines or primary cells were seeded in 96-well plates at 5000–10000 cells per well in complete medium. Cell numbers were quantified daily for 3–5 days using either manual counting with a hemocytometer (Trypan blue exclusion) or a Cell Counting Kit-8 (CCK-8, Beyotime) according to the manufacturer's instructions. The absorbance was measured at 450 nm using a microplate reader.

**Table S1.** **List of primers and shRNA target sequences**

| **Genotyping primers** | **Sequences** |
| --- | --- |
| *BCAT1*-flox-F | TTTCTCCTGGGTACTTTCTTGCTCA |
| *BCAT1*-flox-R | TCCTAACCTCACATTGTTCTGAGCC |
| *Vav1*-*iCre*-F | AGATGCCAGGACATCAGGAACCTG |
| *Vav1*-*iCre*-R | ATCAGCCACACCAGACACAGAGATC |
| **q-PCR primers** | **Sequences** |
| mouse *Bcat1*-F | GGGCTCAGGATCACAAAGAG |
| mouse *Bcat1*-R | CAGATCGACCAAGAATGGGT |
| mouse *Atf4*-F | ATGGCGCTCTTCACGAAATC |
| mouse *Atf4*-R | ACTGGTCGAAGGGGTCATCAA |
| mouse *Jun*-F | CCTTCTACGACGATGCCCTC |
| mouse *Jun*-R | GGTTCAAGGTCATGCTCTGTTT |
| mouse *Lyl1*-F | AAAACTGAGATGGTATGTGCCTC |
| mouse *Lyl1*-R | TGTCCCAGGTTTATCACTGGC |
| mouse *Tfap4*-F | GCTCTGTAGCCTAGCCAACAT |
| mouse *Tfap4*-R | GAAGCCCGCGTTGATACTCT |
| mouse *Stat4*-F | TGGCAACAATTCTGCTTCAAAAC |
| mouse *Stat4*-R | GAGGTCCCTGGATAGGCATGT |
| mouse *Runx2*-F | AACGATCTGAGATTTGTGGGC |
| mouse *Runx2*-R | CCTGCGTGGGATTTCTTGGTT |
| mouse *Pou2af1*-F | CACCAAGGCCATACCAGGG |
| mouse *Pou2af1*-R | GAAGCAGAAACCTCCATGTCA |
| mouse *Acsl6*-R | AAGTGACAGAGAGTCAGTGGG |
| mouse *Acsl6*-F | TAGGGCGGAGAGCCTTCAT |
| mouse *Trf*-F | TGGGGGTTGGGTGTACGAT |
| mouse *Trf*-R | AGCGTAGTAGTAGGTCTGTGG |
| mouse *Cybb*-F | TGTGGTTGGGGCTGAATGTC |
| mouse *Cybb*-R | CTGAGAAAGGAGAGCAGATTTCG |
| mouse *Slc7a11*-F | GGCACCGTCATCGGATCAG |
| mouse *Slc7a11*-R | CTCCACAGGCAGACCAGAAAA |
| mouse β-*actin*-F | GGCTGTATTCCCCTCCATCG |
| mouse β-*actin*-R | CCAGTTGGTAACAATGCCATGT |
| human *BCAT1*-F | GAGCCTGGAAAGGTGGAACTG |
| human *BCAT1*-R | GCTGACACCCATTATCTACTGCT |
| human β-*ACTIN*-F | AGAGCTACGAGCTGCCTGAC |
| human β-*ACTIN*-R | AGCACTGTGTTGGCGTACAG |
| **shRNAs** | **Target sequences** |
| Scramble | CCTAAGGTTAAGTCGCCCTCG |
| mouse sh*Bcat1* #1 | GATGGGAGAAACCTCACATTA |
| mouse sh*Bcat1* #3 | GCATATTCCAACGATGGAGAA |
| human sh*Bcat1* #1 | GCTTTGCACTATGCAGTGGAA |
| human sh*Bcat1* #3 | CCCAATGTGAAGCAGTAGATA |
| **Cloning Primers** | **Sequences** |
| mouse *Pou2af1*-XhoI-F | ACGTGCCTGACTACGCCTCGAGaCTCTGGCAAAGATCCACAGCT |
| mouse *Pou2af1*-EcoRI-R | TTAGGGGGGGGGGGGGGGCGGAATTCAAAGCCCTCCACGGAGA |
| mouse *Slc7a11*-XhoI-F | CGTGCCTGACTACGCCTCGAGaATGGTCAGAAAGCC |
| mouse *Slc7a11*-EcoRI-R | GGGGGGGGGGGGGCGGAATTCTCATAATTCTTTAGA |
| mouse *Pou2af1*(K5R)-Xba1-F | TTCCTCGAGACTAGTTCTAGAATGCTCTGGCAAAGATCCACA |
| mouse *Pou2af1*(K25R)-Xba1-F | TTCCTCGAGACTAGTTCTAGAATGCTCTGGCAAAAATCCACAGCTCCAGAGCAAGCTCCTGCCCCACCAAGGCCATACCAGGGTGTTCGAGTCAGGGAGCCAGTG |
| **Luciferase primers** | **Sequences** |
| mouse *Pou2af1*-promoter-F | GTACCTGAGCTCGCTAGCCTCGAGAGTCCTGAGTTAATGATGATAAA |
| mouse *Pou2af1*-promoter-R | TATATACCCTCTAGTGTCTAAGCTTCACTCACATAATTCTCCAGA |
| *Pou2af1*-F (for ChIP) | CTCATCTCTTTTACAATGGT |
| *Pou2af1*-R (for ChIP) | GGTAAGCAGAGAAAAATTCT |
